# Supplementary material for: Insight into a Fenton-like Reaction Using Nanodiamond Based Relaxometry
Source: MDPI journal article supplement (doi:10.3390/nano12142422), 2022-07-15
Supplement: s1 [file s1]

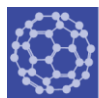

## Supplementary Material

# Insight into a Fenton-Like Reaction Using Nanodiamond Based Relaxometry

Sandeep Kumar Padamati <sup>†</sup>, Thea Annie Vedelaar <sup>†</sup>, Felipe Perona Martínez, Anggrek Citra Nusantara and Romana Schirhagl <sup>\*</sup>

University Medical Center Groningen, University of Groningen, Antonius Deusinglaan 1, 9713AW Groningen, The Netherlands; sandeepimschcu@gmail.com (S.K.P.); solar\_sola@hotmail.com (T.A.V.); felipeperona@gmail.com (F.P.M.); anggrek.citra.n@gmail.com (A.C.N.)

<sup>\*</sup> Correspondence: romana.schirhagl@gmail.com

<sup>†</sup> These authors contributed equally to this work.

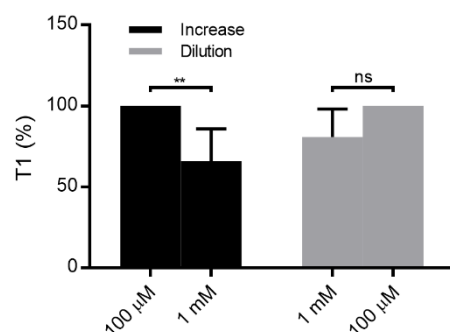

**Scheme S1.** Testing copper adsorption on FNDs. To test if copper adsorbs to the FNDs we reversed the order of experiments.

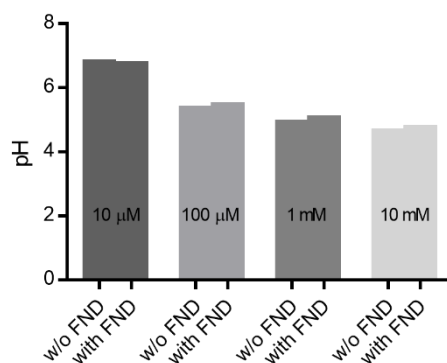

**Scheme S2.** pH values of the differently concentrated copper sulfate solutions with and without FNDs.
